# Supplementary material for: ELK1/MTOR/S6K1 Pathway Contributes to Acquired Resistance to Gefitinib in Non-Small Cell Lung Cancer
Source: MDPI journal article supplement (doi:10.3390/ijms25042382), 2024-02-17
Supplement: s1 [file s1]

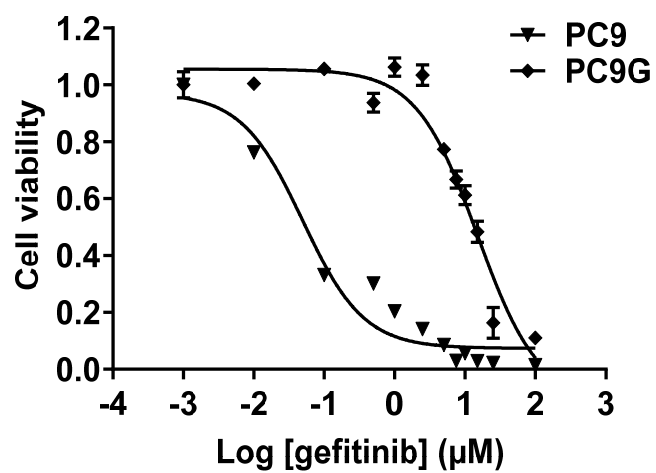

**Supplemental Figure S1. PC9G is resistant to gefitinib compared to PC9 cells.** The 72h IC<sub>50</sub> of gefitinib in PC9 and PC9G cells was measured using an MTT assay.
